# Supplementary material for: Isolation and characterization of a motility-defective mutant of Euglena gracilis
Source: PeerJ. 2020 Sep 28;8:e10002. doi: 10.7717/peerj.10002 (PMC7528813; doi:10.7717/peerj.10002)
Supplement: Data S1 [file peerj-08-10002-s003.xlsx]

## Sheet: Figure1
				number of cells
		strain	medium	with intact cillia	without cillia	with short cillia	[sum] with cillia	[sum] without cillia	proportion of cells with cillia (%)				averarge	stdev
	day1	WT	KH	19	188	0	19	188	9.17874		eu029	KH	36.0157	25.9182
	day2	WT	KH	82	134	0	82	134	37.963		M3	KH	1.66834	1.58457
	day3	WT	KH	148	95	0	148	95	60.9053		eu029	CM	83.6443	2.79482
	day1	M-3ZFeL	KH	0	212	4	4	212	1.85185		M3	CM	14.4804	7.42214
	day2	M-3ZFeL	KH	0	226	0	0	226	0
	day3	M-3ZFeL	KH	0	215	7	7	215	3.15315
	day1	WT	CM	173	42	0	173	42	80.4651
	day2	WT	CM	180	30	0	180	30	85.7143
	day3	WT	CM	189	34	0	189	34	84.7534
	day1	M-3ZFeL	CM	0	187	15	15	187	7.42574
	day2	M-3ZFeL	CM	0	175	28	28	175	13.7931		KH					CM
	day3	M-3ZFeL	CM	0	161	46	46	161	22.2222					ttest						ttest
														0.0418791						5.59844e-05

## Sheet: Figure2
		KH medium（pH3.5）
				OD680									AVERAGE				SD
		列1	Day	WT_1	WT_2	WT_3	M-3ZFeL_1	M-3ZFeL_2	M-3ZFeL_3			Day	WT	M-3ZFeL		Day	WT	M-3ZFeL
		161011	0	0.1	0.1	0.1	0.1	0.1	0.1			0	0.1	0.1		0	1.20185e-17	1.20185e-17
		161012	1	0.217	0.222	0.215	0.236	0.26	0.253			1	0.218	0.249667		1	0.00254951	0.00872735
		161013	2	1.28	1.2	1.09	1	0.859	1.07			2	1.19	0.976333		2	0.0674537	0.0759945
		161014	3	3.77	4.62	3.99	2.21	2.68	2.46			3	4.12667	2.45		3	0.311956	0.166283
		161015	4	13.8	14.5	13.2	5.74	5.98	5.57			4	13.8333	5.76333		4	0.460072	0.145659
		161017	6	23.8	21	22.7	23.6	23.2	21.6			6	22.5	22.8		6	0.997497	0.748331
		161018	7	24.5	27.5	25.3	20.8	20.8	27.4			7	25.7667	23		7	1.09848	2.69444
		161019	8	25.5	20.6	23.3	19.7	20.3	20.8			8	23.1333	20.2667		8	1.73542	0.389444
		161020	9	23.6	22.1	24.2	21.7	20.7	20.7			9	23.3	21.0333		9	0.764853	0.408248
		CMmedium（pH3.5）
				OD680									AVERAGE				SEM
		列1	Day	WT_1	WT_2	WT_3	M-3ZFeL_1	M-3ZFeL_2	M-3ZFeL_3			Day	WT	M-3ZFeL		Day	WT	M-3ZFeL
		161212	0	0.1	0.1	0.1	0.1	0.1	0.1			0	0.1	0.1		0	1.20185e-17	1.20185e-17
		161213	1	0.115	0.094	0.108	0.099	0.113	0.116			1	0.105667	0.109333		1	0.00756086	0.00641613
		161214	2	0.311	0.32	0.313	0.336	0.341	0.333			2	0.314667	0.336667		2	0.00334166	0.00285774
		161216	4	1.85	1.93	1.76	2.24	2.14	2.36			4	1.84667	2.24667		4	0.0601387	0.0778888
		161217	5	3.07	3.19	3.05	3.7	3.29	3.6			5	3.10333	3.53		5	0.0535413	0.151162
		161219	7	6.05	6.01	5.75	6.47	6.55	6.18			7	5.93667	6.4		7	0.115181	0.137659
		161220	8	6.7	6.36	6.2	6.84	6.79	7.03			8	6.42	6.88667		8	0.180555	0.0895358
		161222	10	6.89	6.79	6.97	7.88	7.32	7.36			10	6.88333	7.21333		10	0.0637704	0.220907
		161223	11	6.63	6.34	6.9	7.64	8.01	7.55			11	6.62333	7.73333		11	0.198032	0.172385
		161226	14	6.21	6.6	7.02	7.9	8.59	7.5			14	6.61	7.99667		14	0.286444	0.389893
		161227	15	5.73	6.78	7.37	7.69	9.19	7.85			15	6.62667	8.24333		15	0.587381	0.582466

## Sheet: Figure3
	WT (161214e2)						M-3ZFeL (161214c2)							WT	M-3ZFeL
	Time Step	Trace Momentum	Time	min			Time Step	Trace Momentum	Time	min			TM_average	11160.8	9.11472
	0	0	16:59:04	0			0	0	15:13:21	0			TM_SD	268.776	6.04258
	10	14213	16:59:05	0.02165			10	2611	15:13:22	0.0215833
	20	11304	16:59:06	0.0433			20	6	15:13:23	0.0431667
	30	10977	16:59:08	0.06495			30	10	15:13:25	0.06475
	40	10967	16:59:09	0.0866			40	3	15:13:26	0.0863333
	50	11170	16:59:10	0.10825			50	10	15:13:27	0.107917
	60	11022	16:59:12	0.1299			60	15	15:13:28	0.1295
	70	11243	16:59:13	0.15155			70	9	15:13:30	0.151083
	80	11216	16:59:14	0.1732			80	4	15:13:31	0.172667
	90	11224	16:59:15	0.19485			90	4	15:13:32	0.19425
	100	11086	16:59:17	0.2165			100	8	15:13:34	0.215833
	110	11349	16:59:18	0.23815			110	12	15:13:35	0.237417
	120	10587	16:59:19	0.2598			120	9	15:13:36	0.259
	130	10938	16:59:21	0.28145			130	2	15:13:37	0.280583
	140	11298	16:59:22	0.3031			140	9	15:13:39	0.302167
	150	11362	16:59:23	0.32475			150	2	15:13:40	0.32375
	160	11224	16:59:24	0.3464			160	0	15:13:41	0.345333
	170	11255	16:59:26	0.36805			170	8	15:13:43	0.366917
	180	11291	16:59:27	0.3897			180	5	15:13:44	0.3885
	190	10338	16:59:28	0.41135			190	14	15:13:45	0.410083
	200	11046	16:59:30	0.433			200	10	15:13:46	0.431667
	210	11221	16:59:31	0.45465			210	6	15:13:48	0.45325
	220	11329	16:59:32	0.4763			220	17	15:13:49	0.474833
	230	11323	16:59:33	0.49795			230	10	15:13:50	0.496417
	240	11121	16:59:35	0.5196			240	9	15:13:52	0.518
	250	11380	16:59:36	0.54125			250	4	15:13:53	0.539583
	260	11418	16:59:37	0.5629			260	8	15:13:54	0.561167
	270	11195	16:59:39	0.58455			270	6	15:13:55	0.58275
	280	10936	16:59:40	0.6062			280	10	15:13:57	0.604333
	290	11275	16:59:41	0.62785			290	8	15:13:58	0.625917
	300	11182	16:59:43	0.6495			300	11	15:13:59	0.6475
	310	11419	16:59:44	0.67115			310	7	15:14:01	0.669083
	320	11216	16:59:45	0.6928			320	27	15:14:02	0.690667
	330	11180	16:59:46	0.71445			330	6	15:14:03	0.71225
	340	11238	16:59:48	0.7361			340	7	15:14:05	0.733833
	350	11586	16:59:49	0.75775			350	17	15:14:06	0.755417
	360	11314	16:59:50	0.7794			360	6	15:14:07	0.777
	370	11192	16:59:52	0.80105			370	6	15:14:08	0.798583
	380	11155	16:59:53	0.8227			380	6	15:14:10	0.820167
	390	10692	16:59:54	0.84435			390	6	15:14:11	0.84175
	400	12072	16:59:55	0.866			400	7	15:14:12	0.863333
	410	11334	16:59:57	0.88765			410	11	15:14:14	0.884917
	420	11091	16:59:58	0.9093			420	9	15:14:15	0.9065
	430	10826	16:59:59	0.93095			430	13	15:14:16	0.928083
	440	11224	17:00:01	0.9526			440	12	15:14:17	0.949667
	450	11156	17:00:02	0.97425			450	6	15:14:19	0.97125
	460	11311	17:00:03	0.9959			460	15	15:14:20	0.992833
	470	11317	17:00:05	1.01755			470	4	15:14:21	1.01442
	480	11230	17:00:06	1.0392			480	5	15:14:23	1.036
	490	11320	17:00:07	1.06085			490	8	15:14:24	1.05758
	500	11435	17:00:09	1.0825			500	8	15:14:25	1.07917
	510	12003	17:00:10	1.10415			510	20	15:14:27	1.10075
	520	11164	17:00:11	1.1258			520	2	15:14:28	1.12233
	530	11081	17:00:12	1.14745			530	5	15:14:29	1.14392
	540	11108	17:00:14	1.1691			540	3	15:14:30	1.1655
	550	10997	17:00:15	1.19075			550	0	15:14:32	1.18708
	560	11192	17:00:16	1.2124			560	4	15:14:33	1.20867
	570	11193	17:00:18	1.23405			570	2	15:14:34	1.23025
	580	11296	17:00:19	1.2557			580	14	15:14:36	1.25183
	590	10769	17:00:20	1.27735			590	0	15:14:37	1.27342
	600	11918	17:00:21	1.299			600	8	15:14:38	1.295
	610	10863	17:00:23	1.32065			610	0	15:14:39	1.31658
	620	10916	17:00:24	1.3423			620	6	15:14:41	1.33817
	630	10966	17:00:25	1.36395			630	9	15:14:42	1.35975
	640	10974	17:00:27	1.3856			640	14	15:14:43	1.38133
	650	11187	17:00:28	1.40725			650	4	15:14:45	1.40292
	660	11048	17:00:29	1.4289			660	2	15:14:46	1.4245
	670	11274	17:00:31	1.45055			670	0	15:14:47	1.44608
	680	11199	17:00:32	1.4722			680	3	15:14:49	1.46767
	690	10388	17:00:33	1.49385			690	4	15:14:50	1.48925
	700	10791	17:00:34	1.5155			700	8	15:14:51	1.51083
	710	11168	17:00:36	1.53715			710	8	15:14:52	1.53242
	720	11433	17:00:37	1.5588			720	2	15:14:54	1.554
	730	11822	17:00:38	1.58045			730	0	15:14:55	1.57558
	740	11567	17:00:40	1.6021			740	6	15:14:56	1.59717
	750	10730	17:00:41	1.62375			750	10	15:14:58	1.61875
	760	11405	17:00:42	1.6454			760	13	15:14:59	1.64033
	770	10992	17:00:44	1.66705			770	23	15:15:00	1.66192
	780	10644	17:00:45	1.6887			780	2	15:15:02	1.6835
	790	10881	17:00:46	1.71035			790	6	15:15:03	1.70508
	800	10984	17:00:47	1.732			800	15	15:15:04	1.72667
	810	11055	17:00:49	1.75365			810	6	15:15:05	1.74825
	820	11022	17:00:50	1.7753			820	6	15:15:07	1.76983
	830	10995	17:00:51	1.79695			830	4	15:15:08	1.79142
	840	10708	17:00:53	1.8186			840	6	15:15:09	1.813
	850	10827	17:00:54	1.84025			850	7	15:15:11	1.83458
	860	10757	17:00:55	1.8619			860	6	15:15:12	1.85617
	870	10978	17:00:57	1.88355			870	6	15:15:13	1.87775
	880	10320	17:00:58	1.9052			880	2	15:15:14	1.89933
	890	10972	17:00:59	1.92685			890	14	15:15:16	1.92092
	900	11188	17:01:00	1.9485			900	9	15:15:17	1.9425
	910	11217	17:01:02	1.97015			910	8	15:15:18	1.96408
	920	11753	17:01:03	1.9918			920	7	15:15:20	1.98567
	930	10888	17:01:04	2.01345			930	6	15:15:21	2.00725
	940	11043	17:01:06	2.0351			940	3	15:15:22	2.02883
	950	10907	17:01:07	2.05675			950	4	15:15:24	2.05042
	960	10690	17:01:08	2.0784			960	2	15:15:25	2.072
	970	10706	17:01:10	2.10005			970	33	15:15:26	2.09358
	980	10625	17:01:11	2.1217			980	12	15:15:27	2.11517
	990	11094	17:01:12	2.14335			990	6	15:15:29	2.13675
	1000	11020	17:01:14	2.165			1000	6	15:15:30	2.15833
	1010	10886	17:01:15	2.18665			1010	4	15:15:31	2.17992
	1020	11105	17:01:16	2.2083			1020	2	15:15:33	2.2015
	1030	11091	17:01:17	2.22995			1030	2	15:15:34	2.22308
	1040	11165	17:01:19	2.2516			1040	4	15:15:35	2.24467
	1050	11068	17:01:20	2.27325			1050	6	15:15:37	2.26625
	1060	10850	17:01:21	2.2949			1060	13	15:15:38	2.28783
	1070	11766	17:01:23	2.31655			1070	10	15:15:39	2.30942
	1080	11217	17:01:24	2.3382			1080	6	15:15:41	2.331
	1090	11020	17:01:25	2.35985			1090	16	15:15:42	2.35258
	1100	11006	17:01:27	2.3815			1100	19	15:15:43	2.37417
	1110	10851	17:01:28	2.40315			1110	11	15:15:44	2.39575
	1120	11101	17:01:29	2.4248			1120	8	15:15:46	2.41733
	1130	10882	17:01:31	2.44645			1130	2	15:15:47	2.43892
	1140	11020	17:01:32	2.4681			1140	10	15:15:48	2.4605
	1150	10794	17:01:33	2.48975			1150	4	15:15:50	2.48208
	1160	11003	17:01:34	2.5114			1160	2	15:15:51	2.50367
	1170	10745	17:01:36	2.53305			1170	4	15:15:52	2.52525
	1180	10873	17:01:37	2.5547			1180	4	15:15:53	2.54683
	1190	10947	17:01:38	2.57635			1190	10	15:15:55	2.56842
	1200	11008	17:01:40	2.598			1200	6	15:15:56	2.59
	1210	10963	17:01:41	2.61965			1210	13	15:15:57	2.61158
	1220	10792	17:01:42	2.6413			1220	16	15:15:59	2.63317
	1230	11146	17:01:44	2.66295			1230	8	15:16:00	2.65475
	1240	11010	17:01:45	2.6846			1240	11	15:16:01	2.67633
	1250	10909	17:01:46	2.70625			1250	7	15:16:03	2.69792
	1260	10998	17:01:47	2.7279			1260	8	15:16:04	2.7195
	1270	11381	17:01:49	2.74955			1270	13	15:16:05	2.74108
	1280	11032	17:01:50	2.7712			1280	4	15:16:06	2.76267
	1290	10883	17:01:51	2.79285			1290	9	15:16:08	2.78425
	1300	10865	17:01:53	2.8145			1300	13	15:16:09	2.80583
	1310	11148	17:01:54	2.83615			1310	14	15:16:10	2.82742
	1320	11092	17:01:55	2.8578			1320	23	15:16:12	2.849
	1330	10945	17:01:57	2.87945			1330	7	15:16:13	2.87058
	1340	10876	17:01:58	2.9011			1340	4	15:16:14	2.89217
	1350	11141	17:01:59	2.92275			1350	2	15:16:16	2.91375
	1360	10938	17:02:00	2.9444			1360	4	15:16:17	2.93533
	1370	11053	17:02:02	2.96605			1370	4	15:16:18	2.95692
	1380	11198	17:02:03	2.9877			1380	12	15:16:19	2.9785
	1390	10931	17:02:04	3.00935			1390	8	15:16:21	3.00008
	1400	11284	17:02:06	3.031			1400	6	15:16:22	3.02167
	1410	11297	17:02:07	3.05265			1410	11	15:16:23	3.04325
	1420	11335	17:02:08	3.0743			1420	2	15:16:25	3.06483
	1430	11011	17:02:10	3.09595			1430	5	15:16:26	3.08642
	1440	11481	17:02:11	3.1176			1440	3	15:16:27	3.108
	1450	11197	17:02:12	3.13925			1450	9	15:16:29	3.12958
	1460	11167	17:02:13	3.1609			1460	6	15:16:30	3.15117
	1470	11091	17:02:15	3.18255			1470	4	15:16:31	3.17275
	1480	11005	17:02:16	3.2042			1480	2	15:16:32	3.19433
	1490	11047	17:02:17	3.22585			1490	4	15:16:34	3.21592
	1500	10835	17:02:19	3.2475			1500	13	15:16:35	3.2375
	1510	11742	17:02:20	3.26915			1510	12	15:16:36	3.25908
	1520	11257	17:02:21	3.2908			1520	2	15:16:38	3.28067
	1530	10702	17:02:23	3.31245			1530	11	15:16:39	3.30225
	1540	11909	17:02:24	3.3341			1540	17	15:16:40	3.32383
	1550	11015	17:02:25	3.35575			1550	10	15:16:42	3.34542
	1560	11039	17:02:27	3.3774			1560	11	15:16:43	3.367
	1570	11551	17:02:28	3.39905			1570	2	15:16:44	3.38858
	1580	10538	17:02:29	3.4207			1580	6	15:16:46	3.41017
	1590	11173	17:02:30	3.44235			1590	8	15:16:47	3.43175
	1600	11143	17:02:32	3.464			1600	10	15:16:48	3.45333
	1610	11518	17:02:33	3.48565			1610	6	15:16:49	3.47492
	1620	10932	17:02:34	3.5073			1620	2	15:16:51	3.4965
	1630	11140	17:02:36	3.52895			1630	0	15:16:52	3.51808
	1640	11001	17:02:37	3.5506			1640	2	15:16:53	3.53967
	1650	11212	17:02:38	3.57225			1650	8	15:16:55	3.56125
	1660	11160	17:02:40	3.5939			1660	6	15:16:56	3.58283
	1670	11201	17:02:41	3.61555			1670	3	15:16:57	3.60442
	1680	11258	17:02:42	3.6372			1680	3	15:16:59	3.626
	1690	11515	17:02:44	3.65885			1690	4	15:17:00	3.64758
	1700	11326	17:02:45	3.6805			1700	13	15:17:01	3.66917
	1710	11577	17:02:46	3.70215			1710	15	15:17:02	3.69075
	1720	11595	17:02:47	3.7238			1720	2	15:17:04	3.71233
	1730	11365	17:02:49	3.74545			1730	10	15:17:05	3.73392
	1740	11519	17:02:50	3.7671			1740	6	15:17:06	3.7555
	1750	11476	17:02:51	3.78875			1750	1	15:17:08	3.77708
	1760	11489	17:02:53	3.8104			1760	4	15:17:09	3.79867
	1770	11721	17:02:54	3.83205			1770	6	15:17:10	3.82025
	1780	11479	17:02:55	3.8537			1780	15	15:17:12	3.84183
	1790	11533	17:02:57	3.87535			1790	8	15:17:13	3.86342
	1800	11198	17:02:58	3.897			1800	8	15:17:14	3.885
	1810	11502	17:02:59	3.91865			1810	2	15:17:16	3.90658
	1820	11268	17:03:00	3.9403			1820	6	15:17:17	3.92817
	1830	11146	17:03:02	3.96195			1830	6	15:17:18	3.94975
	1840	11249	17:03:03	3.9836			1840	5	15:17:19	3.97133
	1850	11834	17:03:04	4.00525			1850	6	15:17:21	3.99292
	1860	11394	17:03:06	4.0269			1860	5	15:17:22	4.0145
	1870	11390	17:03:07	4.04855			1870	17	15:17:23	4.03608
	1880	11262	17:03:08	4.0702			1880	2	15:17:25	4.05767
	1890	11372	17:03:10	4.09185			1890	7	15:17:26	4.07925
	1900	10998	17:03:11	4.1135			1900	0	15:17:27	4.10083
	1910	10933	17:03:12	4.13515			1910	12	15:17:29	4.12242
	1920	11133	17:03:13	4.1568			1920	11	15:17:30	4.144
	1930	11129	17:03:15	4.17845			1930	0	15:17:31	4.16558
	1940	10994	17:03:16	4.2001			1940	10	15:17:32	4.18717
	1950	11244	17:03:17	4.22175			1950	8	15:17:34	4.20875
	1960	10877	17:03:19	4.2434			1960	4	15:17:35	4.23033
	1970	10691	17:03:20	4.26505			1970	2	15:17:36	4.25192
	1980	11067	17:03:21	4.2867			1980	11	15:17:38	4.2735
	1990	11150	17:03:23	4.30835			1990	1	15:17:39	4.29508
	2000	10961	17:03:24	4.33			2000	8	15:17:40	4.31667
	2010	10682	17:03:25	4.35165			2010	6	15:17:42	4.33825
	2020	11054	17:03:27	4.3733			2020	3	15:17:43	4.35983
	2030	10814	17:03:28	4.39495			2030	13	15:17:44	4.38142
	2040	10964	17:03:29	4.4166			2040	12	15:17:45	4.403
	2050	10912	17:03:30	4.43825			2050	5	15:17:47	4.42458
	2060	11013	17:03:32	4.4599			2060	13	15:17:48	4.44617
	2070	10810	17:03:33	4.48155			2070	11	15:17:49	4.46775
	2080	11258	17:03:34	4.5032			2080	9	15:17:51	4.48933
	2090	10881	17:03:36	4.52485			2090	4	15:17:52	4.51092
	2100	11114	17:03:37	4.5465			2100	4	15:17:53	4.5325
	2110	11022	17:03:38	4.56815			2110	3	15:17:54	4.55408
	2120	11293	17:03:40	4.5898			2120	9	15:17:56	4.57567
	2130	11273	17:03:41	4.61145			2130	5	15:17:57	4.59725
	2140	10824	17:03:42	4.6331			2140	9	15:17:58	4.61883
	2150	11166	17:03:43	4.65475			2150	2	15:18:00	4.64042
	2160	10928	17:03:45	4.6764			2160	11	15:18:01	4.662
	2170	10875	17:03:46	4.69805			2170	7	15:18:02	4.68358
	2180	11318	17:03:47	4.7197			2180	17	15:18:03	4.70517
	2190	11095	17:03:49	4.74135			2190	9	15:18:05	4.72675
	2200	10846	17:03:50	4.763			2200	10	15:18:06	4.74833
	2210	10900	17:03:51	4.78465			2210	13	15:18:07	4.76992
	2220	10918	17:03:53	4.8063			2220	6	15:18:09	4.7915
	2230	10871	17:03:54	4.82795			2230	17	15:18:10	4.81308
	2240	10970	17:03:55	4.8496			2240	24	15:18:11	4.83467
	2250	10890	17:03:57	4.87125			2250	29	15:18:13	4.85625
	2260	11092	17:03:58	4.8929			2260	11	15:18:14	4.87783
	2270	11264	17:03:59	4.91455			2270	2	15:18:15	4.89942
	2280	10877	17:04:00	4.9362			2280	9	15:18:16	4.921
	2290	11048	17:04:02	4.95785			2290	17	15:18:18	4.94258
	2300	10823	17:04:03	4.9795			2300	4	15:18:19	4.96417
	2310	10812	17:04:04	5.00115			2310	10	15:18:20	4.98575
	2320	11003	17:04:06	5.0228			2320	18	15:18:22	5.00733
	2330	10686	17:04:07	5.04445			2330	7	15:18:23	5.02892
	2340	10967	17:04:08	5.0661			2340	8	15:18:24	5.0505
	2350	11054	17:04:10	5.08775			2350	7	15:18:26	5.07208
	2360	10931	17:04:11	5.1094			2360	8	15:18:27	5.09367
	2370	10713	17:04:12	5.13105			2370	5	15:18:28	5.11525
	2380	10925	17:04:13	5.1527			2380	6	15:18:29	5.13683
	2390	10765	17:04:15	5.17435			2390	1	15:18:31	5.15842
	2400	10900	17:04:16	5.196			2400	10	15:18:32	5.18
	2410	10665	17:04:17	5.21765			2410	6	15:18:33	5.20158
	2420	10690	17:04:19	5.2393			2420	11	15:18:35	5.22317
	2430	10924	17:04:20	5.26095			2430	9	15:18:36	5.24475
	2440	11327	17:04:21	5.2826			2440	12	15:18:37	5.26633
	2450	11019	17:04:22	5.30425			2450	2	15:18:39	5.28792
	2460	11385	17:04:24	5.3259			2460	2	15:18:40	5.3095
	2470	11129	17:04:25	5.34755			2470	10	15:18:41	5.33108
	2480	11159	17:04:26	5.3692			2480	8	15:18:42	5.35267
	2490	11240	17:04:28	5.39085			2490	12	15:18:44	5.37425
	2500	11404	17:04:29	5.4125			2500	4	15:18:45	5.39583
	2510	11004	17:04:30	5.43415			2510	10	15:18:46	5.41742
	2520	10825	17:04:32	5.4558			2520	13	15:18:48	5.439
	2530	11161	17:04:33	5.47745			2530	26	15:18:49	5.46058
	2540	11252	17:04:34	5.4991			2540	16	15:18:50	5.48217
	2550	10925	17:04:35	5.52075			2550	2	15:18:52	5.50375
	2560	11032	17:04:37	5.5424			2560	14	15:18:53	5.52533
	2570	10937	17:04:38	5.56405			2570	8	15:18:54	5.54692
	2580	11084	17:04:39	5.5857			2580	10	15:18:55	5.5685
	2590	11061	17:04:41	5.60735			2590	13	15:18:57	5.59008
	2600	10874	17:04:42	5.629			2600	13	15:18:58	5.61167
	2610	11159	17:04:43	5.65065			2610	4	15:18:59	5.63325
	2620	10809	17:04:45	5.6723			2620	19	15:19:01	5.65483
	2630	11291	17:04:46	5.69395			2630	2	15:19:02	5.67642
	2640	11291	17:04:47	5.7156			2640	12	15:19:03	5.698
	2650	11026	17:04:48	5.73725			2650	6	15:19:04	5.71958
	2660	11442	17:04:50	5.7589			2660	19	15:19:06	5.74117
	2670	11410	17:04:51	5.78055			2670	34	15:19:07	5.76275
	2680	11307	17:04:52	5.8022			2680	8	15:19:08	5.78433
	2690	10848	17:04:54	5.82385			2690	13	15:19:10	5.80592
	2700	11403	17:04:55	5.8455			2700	20	15:19:11	5.8275
	2710	10891	17:04:56	5.86715			2710	11	15:19:12	5.84908
	2720	11066	17:04:58	5.8888			2720	5	15:19:13	5.87067
	2730	11118	17:04:59	5.91045			2730	12	15:19:15	5.89225
	2740	11386	17:05:00	5.9321			2740	8	15:19:16	5.91383
	2750	11095	17:05:01	5.95375			2750	19	15:19:17	5.93542
	2760	11302	17:05:03	5.9754			2760	6	15:19:19	5.957
	2770	11119	17:05:04	5.99705			2770	4	15:19:20	5.97858
	2780	11142	17:05:05	6.0187			2780	13	15:19:21	6.00017
	2790	11077	17:05:07	6.04035			2790	9	15:19:23	6.02175
	2800	11204	17:05:08	6.062			2800	8	15:19:24	6.04333
	2810	11352	17:05:09	6.08365			2810	2	15:19:25	6.06492
	2820	11266	17:05:11	6.1053			2820	21	15:19:26	6.0865
	2830	11363	17:05:12	6.12695			2830	4	15:19:28	6.10808
	2840	11299	17:05:13	6.1486			2840	11	15:19:29	6.12967
	2850	11422	17:05:14	6.17025			2850	12	15:19:30	6.15125
	2860	11371	17:05:16	6.1919			2860	3	15:19:32	6.17283
	2870	11274	17:05:17	6.21355			2870	11	15:19:33	6.19442
	2880	11357	17:05:18	6.2352			2880	19	15:19:34	6.216
	2890	11278	17:05:20	6.25685			2890	25	15:19:36	6.23758
	2900	11591	17:05:21	6.2785			2900	4	15:19:37	6.25917
	2910	11670	17:05:22	6.30015			2910	11	15:19:38	6.28075
	2920	11138	17:05:24	6.3218			2920	10	15:19:39	6.30233
	2930	11181	17:05:25	6.34345			2930	14	15:19:41	6.32392
	2940	11171	17:05:26	6.3651			2940	7	15:19:42	6.3455
	2950	11578	17:05:28	6.38675			2950	2	15:19:43	6.36708
	2960	11527	17:05:29	6.4084			2960	13	15:19:45	6.38867
	2970	11181	17:05:30	6.43005			2970	8	15:19:46	6.41025
	2980	11252	17:05:31	6.4517			2980	9	15:19:47	6.43183
	2990	11173	17:05:33	6.47335			2990	2	15:19:48	6.45342
	3000	10919	17:05:34	6.495			3000	4	15:19:50	6.475
	3010	11118	17:05:35	6.51665			3010	2	15:19:51	6.49658
	3020	10944	17:05:37	6.5383			3020	8	15:19:52	6.51817
	3030	11494	17:05:38	6.55995			3030	6	15:19:54	6.53975
	3040	11094	17:05:39	6.5816			3040	4	15:19:55	6.56133
	3050	11335	17:05:41	6.60325			3050	7	15:19:56	6.58292
	3060	11110	17:05:42	6.6249			3060	8	15:19:58	6.6045
	3070	11118	17:05:43	6.64655			3070	2	15:19:59	6.62608
	3080	11316	17:05:44	6.6682			3080	13	15:20:00	6.64767
	3090	11217	17:05:46	6.68985			3090	10	15:20:01	6.66925
	3100	10706	17:05:47	6.7115			3100	12	15:20:03	6.69083
	3110	10993	17:05:48	6.73315			3110	9	15:20:04	6.71242
	3120	11045	17:05:50	6.7548			3120	5	15:20:05	6.734
	3130	11346	17:05:51	6.77645			3130	0	15:20:07	6.75558
	3140	10920	17:05:52	6.7981			3140	12	15:20:08	6.77717
	3150	10965	17:05:54	6.81975			3150	12	15:20:09	6.79875
	3160	10542	17:05:55	6.8414			3160	2	15:20:10	6.82033
	3170	11322	17:05:56	6.86305			3170	5	15:20:12	6.84192
	3180	11003	17:05:57	6.8847			3180	16	15:20:13	6.8635
	3190	11315	17:05:59	6.90635			3190	8	15:20:14	6.88508
	3200	11098	17:06:00	6.928			3200	9	15:20:16	6.90667
	3210	11213	17:06:01	6.94965			3210	4	15:20:17	6.92825
	3220	11107	17:06:03	6.9713			3220	2	15:20:18	6.94983
	3230	11118	17:06:04	6.99295			3230	6	15:20:20	6.97142
	3240	11365	17:06:05	7.0146			3240	4	15:20:21	6.993
	3250	10885	17:06:07	7.03625			3250	6	15:20:22	7.01458
	3260	11258	17:06:08	7.0579			3260	6	15:20:23	7.03617
	3270	11503	17:06:09	7.07955			3270	13	15:20:25	7.05775
	3280	11196	17:06:10	7.1012			3280	5	15:20:26	7.07933
	3290	11306	17:06:12	7.12285			3290	10	15:20:27	7.10092
	3300	11068	17:06:13	7.1445			3300	3	15:20:29	7.1225
	3310	11203	17:06:14	7.16615			3310	15	15:20:30	7.14408
	3320	11369	17:06:16	7.1878			3320	6	15:20:31	7.16567
	3330	11334	17:06:17	7.20945			3330	4	15:20:32	7.18725
	3340	11362	17:06:18	7.2311			3340	11	15:20:34	7.20883
	3350	11076	17:06:19	7.25275			3350	4	15:20:35	7.23042
	3360	11316	17:06:21	7.2744			3360	9	15:20:36	7.252
	3370	10501	17:06:22	7.29605			3370	6	15:20:38	7.27358
	3380	11110	17:06:23	7.3177			3380	20	15:20:39	7.29517
	3390	11172	17:06:25	7.33935			3390	9	15:20:40	7.31675
	3400	11449	17:06:26	7.361			3400	6	15:20:42	7.33833
	3410	11715	17:06:27	7.38265			3410	6	15:20:43	7.35992
	3420	11181	17:06:28	7.4043			3420	8	15:20:44	7.3815
	3430	11054	17:06:30	7.42595			3430	8	15:20:45	7.40308
	3440	11434	17:06:31	7.4476			3440	8	15:20:47	7.42467
	3450	11342	17:06:32	7.46925			3450	13	15:20:48	7.44625
	3460	11614	17:06:34	7.4909			3460	4	15:20:49	7.46783
	3470	11629	17:06:35	7.51255			3470	9	15:20:51	7.48942
	3480	11410	17:06:36	7.5342			3480	10	15:20:52	7.511
	3490	11235	17:06:38	7.55585			3490	8	15:20:53	7.53258
	3500	11361	17:06:39	7.5775			3500	13	15:20:55	7.55417
	3510	11148	17:06:40	7.59915			3510	9	15:20:56	7.57575
	3520	11387	17:06:41	7.6208			3520	26	15:20:57	7.59733
	3530	11260	17:06:43	7.64245			3530	4	15:20:59	7.61892
	3540	11206	17:06:44	7.6641			3540	10	15:21:00	7.6405
	3550	11278	17:06:45	7.68575			3550	6	15:21:01	7.66208
	3560	10973	17:06:47	7.7074			3560	5	15:21:02	7.68367
	3570	11226	17:06:48	7.72905			3570	10	15:21:04	7.70525
	3580	10388	17:06:49	7.7507			3580	7	15:21:05	7.72683
	3590	11331	17:06:50	7.77235			3590	11	15:21:06	7.74842
	3600	11372	17:06:52	7.794			3600	10	15:21:08	7.77
	3610	10998	17:06:53	7.81565			3610	14	15:21:09	7.79158
	3620	11317	17:06:54	7.8373			3620	20	15:21:10	7.81317
	3630	11500	17:06:56	7.85895			3630	10	15:21:11	7.83475
	3640	11158	17:06:57	7.8806			3640	2	15:21:13	7.85633
	3650	11411	17:06:58	7.90225			3650	16	15:21:14	7.87792
	3660	11232	17:07:00	7.9239			3660	14	15:21:15	7.8995
	3670	10872	17:07:01	7.94555			3670	21	15:21:17	7.92108
	3680	11341	17:07:02	7.9672			3680	4	15:21:18	7.94267
	3690	11179	17:07:03	7.98885			3690	9	15:21:19	7.96425
	3700	11195	17:07:05	8.0105			3700	11	15:21:20	7.98583
	3710	11008	17:07:06	8.03215			3710	9	15:21:22	8.00742
	3720	11257	17:07:07	8.0538			3720	6	15:21:23	8.029
	3730	11349	17:07:09	8.07545			3730	6	15:21:24	8.05058
	3740	11262	17:07:10	8.0971			3740	21	15:21:26	8.07217
	3750	11054	17:07:11	8.11875			3750	14	15:21:27	8.09375
	3760	11659	17:07:13	8.1404			3760	25	15:21:28	8.11533
	3770	11250	17:07:14	8.16205			3770	2	15:21:30	8.13692
	3780	11489	17:07:15	8.1837			3780	10	15:21:31	8.1585
	3790	11170	17:07:16	8.20535			3790	2	15:21:32	8.18008
	3800	11355	17:07:18	8.227			3800	36	15:21:33	8.20167
	3810	10890	17:07:19	8.24865			3810	21	15:21:35	8.22325
	3820	11121	17:07:20	8.2703			3820	21	15:21:36	8.24483
	3830	11368	17:07:22	8.29195			3830	25	15:21:37	8.26642
	3840	11416	17:07:23	8.3136			3840	14	15:21:39	8.288
	3850	11370	17:07:24	8.33525			3850	15	15:21:40	8.30958
	3860	10969	17:07:26	8.3569			3860	0	15:21:41	8.33117
	3870	10669	17:07:27	8.37855			3870	11	15:21:42	8.35275
	3880	10374	17:07:28	8.4002			3880	6	15:21:44	8.37433
	3890	11190	17:07:29	8.42185			3890	17	15:21:45	8.39592
	3900	11203	17:07:31	8.4435			3900	16	15:21:46	8.4175
	3910	11268	17:07:32	8.46515			3910	12	15:21:48	8.43908
	3920	11104	17:07:33	8.4868			3920	15	15:21:49	8.46067
	3930	10961	17:07:35	8.50845			3930	15	15:21:50	8.48225
	3940	11267	17:07:36	8.5301			3940	17	15:21:52	8.50383
	3950	11174	17:07:37	8.55175			3950	8	15:21:53	8.52542
	3960	11169	17:07:38	8.5734			3960	4	15:21:54	8.547
	3970	11380	17:07:40	8.59505			3970	4	15:21:55	8.56858
	3980	11039	17:07:41	8.6167			3980	8	15:21:57	8.59017
	3990	10988	17:07:42	8.63835			3990	4	15:21:58	8.61175
	4000	11314	17:07:44	8.66			4000	15	15:21:59	8.63333
	4010	11071	17:07:45	8.68165			4010	11	15:22:01	8.65492
	4020	11249	17:07:46	8.7033			4020	11	15:22:02	8.6765
	4030	11157	17:07:48	8.72495			4030	4	15:22:03	8.69808
	4040	11456	17:07:49	8.7466			4040	4	15:22:05	8.71967
	4050	11408	17:07:50	8.76825			4050	13	15:22:06	8.74125
	4060	11058	17:07:51	8.7899			4060	13	15:22:07	8.76283
	4070	11246	17:07:53	8.81155			4070	10	15:22:08	8.78442
	4080	11271	17:07:54	8.8332			4080	8	15:22:10	8.806
	4090	11215	17:07:55	8.85485			4090	6	15:22:11	8.82758
	4100	10807	17:07:57	8.8765			4100	21	15:22:12	8.84917
	4110	11094	17:07:58	8.89815			4110	11	15:22:14	8.87075
	4120	11433	17:07:59	8.9198			4120	6	15:22:15	8.89233
	4130	11618	17:08:00	8.94145			4130	16	15:22:16	8.91392
	4140	11387	17:08:02	8.9631			4140	0	15:22:17	8.9355
	4150	11199	17:08:03	8.98475			4150	8	15:22:19	8.95708
	4160	11535	17:08:04	9.0064			4160	9	15:22:20	8.97867
	4170	11680	17:08:06	9.02805			4170	9	15:22:21	9.00025
	4180	10967	17:08:07	9.0497			4180	14	15:22:23	9.02183
	4190	11424	17:08:08	9.07135			4190	15	15:22:24	9.04342
	4200	11263	17:08:10	9.093			4200	20	15:22:25	9.065
	4210	11722	17:08:11	9.11465			4210	20	15:22:26	9.08658
	4220	11494	17:08:12	9.1363			4220	19	15:22:28	9.10817
	4230	11163	17:08:13	9.15795			4230	8	15:22:29	9.12975
	4240	11371	17:08:15	9.1796			4240	5	15:22:30	9.15133
	4250	11452	17:08:16	9.20125			4250	11	15:22:32	9.17292
	4260	11119	17:08:17	9.2229			4260	21	15:22:33	9.1945
	4270	11150	17:08:19	9.24455			4270	6	15:22:34	9.21608
	4280	11470	17:08:20	9.2662			4280	8	15:22:36	9.23767
	4290	11559	17:08:21	9.28785			4290	20	15:22:37	9.25925
	4300	11364	17:08:23	9.3095			4300	22	15:22:38	9.28083
	4310	12031	17:08:24	9.33115			4310	19	15:22:39	9.30242
	4320	11032	17:08:25	9.3528			4320	21	15:22:41	9.324
	4330	10682	17:08:26	9.37445			4330	16	15:22:42	9.34558
	4340	11421	17:08:28	9.3961			4340	10	15:22:43	9.36717
	4350	11559	17:08:29	9.41775			4350	2	15:22:45	9.38875
	4360	11321	17:08:30	9.4394			4360	10	15:22:46	9.41033
	4370	11508	17:08:32	9.46105			4370	13	15:22:47	9.43192
	4380	11491	17:08:33	9.4827			4380	26	15:22:49	9.4535
	4390	11280	17:08:34	9.50435			4390	12	15:22:50	9.47508
	4400	10972	17:08:36	9.526			4400	16	15:22:51	9.49667
	4410	11346	17:08:37	9.54765			4410	11	15:22:52	9.51825
	4420	11240	17:08:38	9.5693			4420	2	15:22:54	9.53983
	4430	11532	17:08:40	9.59095			4430	7	15:22:55	9.56142
	4440	11376	17:08:41	9.6126			4440	4	15:22:56	9.583
	4450	11101	17:08:42	9.63425			4450	17	15:22:58	9.60458
	4460	11468	17:08:43	9.6559			4460	8	15:22:59	9.62617
	4470	10613	17:08:45	9.67755			4470	13	15:23:00	9.64775
	4480	11491	17:08:46	9.6992			4480	25	15:23:02	9.66933
	4490	11671	17:08:47	9.72085			4490	11	15:23:03	9.69092
	4500	11470	17:08:49	9.7425			4500	31	15:23:04	9.7125
	4510	11614	17:08:50	9.76415			4510	12	15:23:05	9.73408
	4520	11277	17:08:51	9.7858			4520	10	15:23:07	9.75567
	4530	10804	17:08:52	9.80745			4530	10	15:23:08	9.77725
	4540	11520	17:08:54	9.8291			4540	9	15:23:09	9.79883
	4550	11170	17:08:55	9.85075			4550	9	15:23:11	9.82042
	4560	11349	17:08:56	9.8724			4560	10	15:23:12	9.842
	4570	11284	17:08:58	9.89405			4570	5	15:23:13	9.86358
	4580	10772	17:08:59	9.9157			4580	6	15:23:15	9.88517
	4590	11141	17:09:00	9.93735			4590	8	15:23:16	9.90675
	4600	11105	17:09:02	9.959			4600	11	15:23:17	9.92833
	4610	11144	17:09:03	9.98065			4610	7	15:23:18	9.94992
	4620	11209	17:09:04	10.0023			4620	21	15:23:20	9.9715
	4630	11032	17:09:05	10.0239			4630	4	15:23:21	9.99308
	4640	11248	17:09:07	10.0456			4640	4	15:23:22	10.0147
	4650	11196	17:09:08	10.0672			4650	4	15:23:24	10.0362
	4660	11202	17:09:09	10.0889			4660	10	15:23:25	10.0578
	4670	10438	17:09:11	10.1105			4670	6	15:23:26	10.0794
	4680	11057	17:09:12	10.1322			4680	10	15:23:28	10.101
	4690	11100	17:09:13	10.1538			4690	7	15:23:29	10.1226
	4700	11283	17:09:14	10.1755			4700	4	15:23:30	10.1442

## Sheet: Figure4
	KH medium		Time(min)	0	1	2	3	4	5	6	7	8	9	10	11	12	14	15	16	17	18	19	25	30	35	40
			WT_1	2699.71	4115.77	4434.29	5140.89	3830.39	3098.78	3648.49	2393.69	2540.05	2567.91	2261.86	2672.88	2504.76	2453.52	2983.18	3246.2	2967.5	3110.52	3117	3193.3	3393.83	2993.05	2555.52
			WT_2	1939.93	3544.36	3771.48	3935.66	2561.76	2302.78	2965.85	1640.4	1326.62	1966.35	2034.98	1818	1609.45	1666.33	1190.2	1382.15	1614.5	1703.1	1953.22	1454.33	1435.15	1475.5	1376.93
			WT_3	1634.15	3067.24	4837.55	4517.77	4022.12	3428.53	4151.53	2382.3	2001.64	7732.98	2360.88	2225.54	2040.88	2194.1	1950.64	2256.88	1842.35	2052.81	2408.18	1978.69	2110.3	2163.47	1706.93
			M-3ZFeL_1	1273.45	1171.03	1691.61	2186.12	1751.25	1183.96	1422.03	1201.62	1439.69	1804.1	1733.05	2351.42	2092.98	1949.35	2032.74	2617.88	2371.2	1992.26	2766.1	3709.76	4503.18	5740.78	5090.83
			M-3ZFeL_2	1651.22	2589.97	1881.88	3031.25	2869.15	2254.93	2479.69	2869.64	3477.44	4006	3992.88	4941	4849.25	5475.83	5951	6747.44	6961.07	7267.02	7836.27	9159.68	10490.5	11242.3	10750.8
			M-3ZFeL_3	1445.76	2258.41	2844.58	3465.87	3295.58	2738.22	3338.75	2867.76	3194.66	4333.66	3839.42	5092.83	5352.2	5467.12	5960.49	6564.32	6788.83	6958.07	7488.02	9244.85	10194.8	10808.4	10327
			AVERAGE/1000
			Time(min)	0	1	2	3	4	5	6	7	8	9	10	11	12	14	15	16	17	18	19	25	30	35	40
			WT	2.09127	3.57579	4.34777	4.53144	3.47142	2.94336	3.58862	2.13879	1.9561	4.08908	2.21924	2.23881	2.0517	2.10465	2.04134	2.29508	2.14145	2.28881	2.4928	2.20877	2.31309	2.21067	1.87979
			M-3ZFeL	1.45681	2.00647	2.13936	2.89441	2.63866	2.05904	2.41349	2.31301	2.70393	3.38126	3.18845	4.12842	4.09814	4.29743	4.64808	5.30988	5.3737	5.40578	6.03013	7.37143	8.39615	9.26382	8.72289
			SD/1000
			Time(min)	0	1	2	3	4	5	6	7	8	9	10	11	12	14	15	16	17	18	19	25	30	35	40
			WT	0.387962	0.371212	0.380618	0.426197	0.56116	0.409233	0.4208	0.305231	0.429919	2.24154	0.118141	0.302354	0.316611	0.283654	0.636339	0.659453	0.512224	0.518158	0.414709	0.630756	0.703545	0.537316	0.429928
			M-3ZFeL	0.133736	0.524856	0.437067	0.460153	0.563953	0.562454	0.678874	0.680583	0.780614	0.972727	0.892895	1.08951	1.24071	1.43791	1.60156	1.64978	1.83966	2.0932	2.00259	2.24251	2.38624	2.16286	2.22921
	CM medium		Time(min)	0	1	2	3	4	5	6	7	8	9	10	11	12	14	15	16	17	18	19	25	30	35
			WT_1	131.728	1099.98	397.598	763.376	1843.47	3367.95	3951.42	4027.05	4600	5466.78	5883.95	7101.3	7037.32	6293.54	8438.09	8710.8	9308.34	9517.92	10417.3	10913.5	12851.3	12842.2	9360.48
			WT_2	1119.93	1432.22	848.983	1289.35	1751.05	3159.05	3548.42	4095.32	4687.2	4919.54	5913.25	7053.39	6643.85	7465.15	7666.61	7847.44	8350.85	8272.73	9475.65	10538.1	10817.7	11532.4	7588.89
			WT_3	763.79	1297.88	775.882	820.154	1944.1	2250.91	3285.4	3885.49	3906.47	5417.32	6331.95	6620.9	5919.95	5993.12	7099.97	7917.8	8604.51	9413.26	8216.05	9709.48	12034.5	11050.7	7547.09
			M-3ZFeL_1	490.134	1227.52	741.669	1166.5	2033.4	4739.8	5746.44	6020.1	6200.07	6500.85	8205.22	8591.15	8022.39	9260.61	10350.8	10714.9	11786.1	11768.1	11665.4	14260.8	17050.7	19666.5	15631.1
			M-3ZFeL_2	428.548	1427.64	576.87	2883.81	4792.51	3273.02	4836.85	5427.41	5961.63	6565.56	7795.1	7968.8	7617.56	8351.09	8559.68	10351.1	11256.2	12074.8	11803.8	13346.5	15664.5	17190.1	14679.1
			M-3ZFeL_3	22.243	594.033	120.849	202.678	652.77	1746.28	2622.33	3241.15	3773.28	4781.49	7198.05	7191.49	17077.4	8296.09	9556.44	10912.4	12489.8	13784	13733.3	16130.4	20711	23287.2	22883.6
			AVERAGE/1000
			Time(min)	0	1	2	3	4	5	6	7	8	9	10	11	12	14	15	16	17	18	19	25	30	35	40
			WT	0.671817	1.2767	0.674154	0.957626	1.84621	2.92597	3.59508	4.00262	4.39789	5.26788	6.04305	6.9252	6.53371	6.58394	7.73489	8.15868	8.75457	9.06797	9.36967	10.387	11.9012	11.8084	8.16549
			M-3ZFeL	0.313642	1.08306	0.479796	1.41766	2.49289	3.25303	4.40187	4.89622	5.31166	5.9493	7.73279	7.91715	10.9058	8.63593	9.48896	10.6595	11.844	12.5423	12.4008	14.5792	17.8087	20.0479	17.7312
			SEM/1000
			Time(min)	0	1	2	3	4	5	6	7	8	9	10	11	12	14	15	16	17	18	19	25	30	35	40
			WT	0.353894	0.11818	0.171316	0.204126	0.0682709	0.419935	0.237201	0.0756793	0.302508	0.21403	0.177219	0.187109	0.400765	0.549982	0.474942	0.339018	0.350772	0.488387	0.780966	0.435628	0.723608	0.65554	0.73193
			M-3ZFeL	0.179768	0.307714	0.2274	0.960321	1.49042	1.05844	1.13621	1.03495	0.945829	0.715502	0.358128	0.495864	3.78203	0.383029	0.634586	0.201343	0.437561	0.768053	0.817424	1.00341	1.84361	2.16827	3.17306

## Sheet: Figure5
		sediment (g/L)
	hour	WT	M-3ZFeL
	0	0.37	0.32
	3.5	3	34.1

## Sheet: Figure6_1
		standard 1
		glucose (μg/mL)	A480		sample No.	sample	A480	dilution	A480'	glucose density (μg/mL)	sample (mg)	glucose in sample (μg)	paramylon content	paramylon content (%)	standard	linear approximation of standard		t-test
	1	0	0.019		1	WT (KH)_1	1.04	2	2.08	588.857	11.3	5.88857	0.521113	52.1113	1	y=0.0035x+0.019		0.859563
	2	10	0.056		2	WT (KH)_2	0.703	2	1.406	374.324	10.3	3.74324	0.363422	36.3422	2	y=0.0037x+0.021
	3	50	0.203		3	WT (KH)_3	0.699	2	1.398	372.162	10.3	3.72162	0.361322	36.1322	2	y=0.0037x+0.021
	4	150	0.494		4	M-3ZFeL (KH)_1	0.787	2	1.574	444.286	10.7	4.44286	0.41522	41.522	1	y=0.0035x+0.019
	5	250	0.886		5	M-3ZFeL (KH)_2	0.848	2	1.696	452.703	10.5	4.52703	0.431145	43.1145	2	y=0.0037x+0.021
	6	500	1.793		6	M-3ZFeL (KH)_3	0.837	2	1.674	446.757	10.4	4.46757	0.429574	42.9574	2	y=0.0037x+0.021
	7				7	WT (CM)_1	0.082	2	0.164	41.4286	10.8	0.414286	0.0383598	3.83598	1	y=0.0035x+0.019		0.033015
					8	WT (CM)_2	0.161	1	0.161	34.2105	11	0.342105	0.0311005	3.11005	3	y=0.0038x+0.032
		standard 2			9	WT (CM)_3	0.153	1	0.153	35.6757	10.3	0.356757	0.0346366	3.46366	2	y=0.0037x+0.021
		glucose (μg/mL)	A480		3	M-3ZFeL (CM)_1	0.241	1	0.241	55.2632	11	0.552632	0.0502392	5.02392	1	y=0.0035x+0.019
	1	0	0.021		11	M-3ZFeL (CM)_2	0.23	1	0.23	78.4483	11.5	0.784483	0.0682159	6.82159	4	y=0.0029x+0.025
	2	10	0.059		12	M-3ZFeL (CM)_3	0.207	1	0.207	50.2703	10.3	0.502703	0.0488061	4.88061	2	y=0.0037x+0.021
	3	50	0.204
	4	150	0.542
	5	250	0.922									average
	6	500	1.886									WT (KH)	0.415286	41.5286
	7											M-3ZFeL (KH)	0.425313	42.5313
												WT (CM)	0.0346989	3.46989
		standard 3										M-3ZFeL (CM)	0.0557537	5.57537
		glucose (μg/mL)	A480
	1	0	0.031									SEM
	2	10	0.064									WT (KH)	0.0529169	5.29169
	3	50	0.221									M-3ZFeL (KH)	0.00506679	0.506679
	4	150	0.628									WT (CM)	0.00209581	0.209581
	5	250	1.015									M-3ZFeL (CM)	0.0062448	0.62448
	6	500	1.902
		standard 4
		glucose (μg/mL)	A480
	1	0	0.025
	2	10	0.049
	3	50	0.171
	4	150	0.446
	5	250	0.714
	6	500	1.522

## Sheet: Figure6_2
		sample No.	sample	sample (g)	extracted lipid (g)	lipid content	lipid content (%)		t-test
		1	WT (KH)_1	0.1028	0.0236	0.229572	22.9572		0.0718309
		2	WT (KH)_2	0.1049	0.0234	0.22307	22.307
		3	WT (KH)_3	0.1018	0.0216	0.212181	21.2181
		4	M-3ZFeL (KH)_1	0.1029	0.0218	0.211856	21.1856
		5	M-3ZFeL (KH)_2	0.1024	0.0175	0.170898	17.0898
		6	M-3ZFeL (KH)_3	0.1025	0.0162	0.158049	15.8049
		7	WT (CM)_1	0.1067	0.0182	0.170572	17.0572		0.0344423
		8	WT (CM)_2	0.1027	0.0176	0.171373	17.1373
		9	WT (CM)_3	0.101	0.0201	0.19901	19.901
		3	M-3ZFeL (CM)_1	0.1054	0.0145	0.137571	13.7571
		11	M-3ZFeL (CM)_2	0.1032	0.0162	0.156977	15.6977
		12	M-3ZFeL (CM)_3	0.1028	0.0146	0.142023	14.2023
									average
									WT (KH)	0.221607	22.1607
									M-3ZFeL (KH)	0.180268	18.0268
									WT (CM)	0.180318	18.0318
									M-3ZFeL (CM)	0.145524	14.5524
									SEM
									WT (KH)	0.00507337	0.507337
									M-3ZFeL (KH)	0.0162239	1.62239
									WT (CM)	0.00934872	0.934872
									M-3ZFeL (CM)	0.00586895	0.586895
