# Supplementary material for: Isolation and characterization of a motility-defective mutant of Euglena gracilis
Source: PeerJ journal article supplement (doi:10.7717/peerj.10002), 2020-09-28

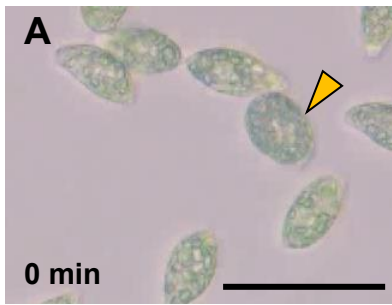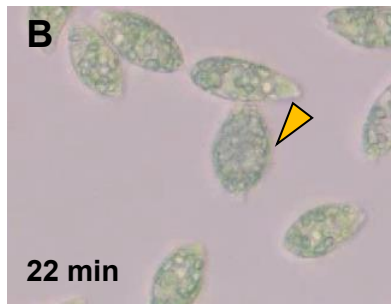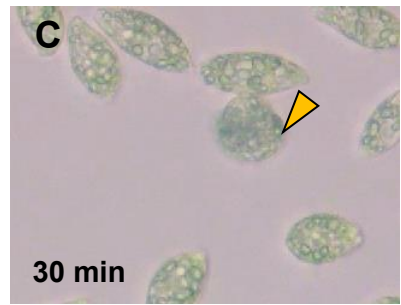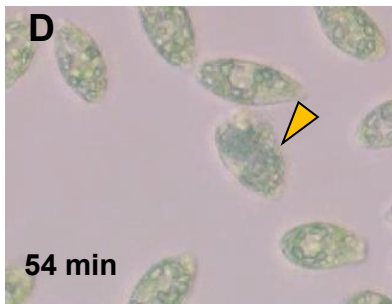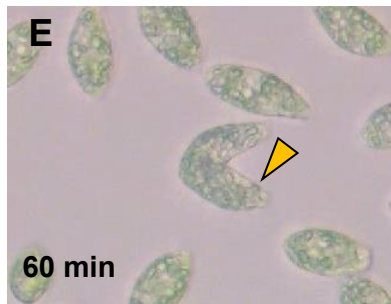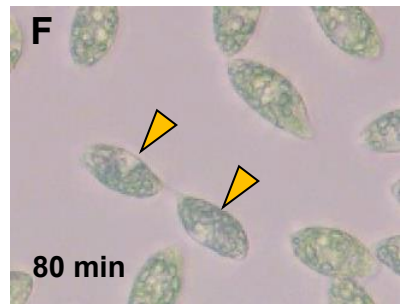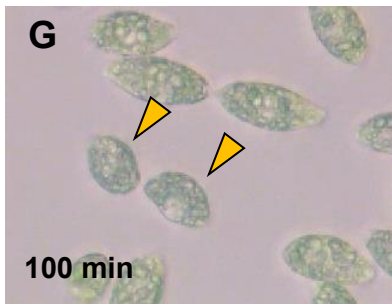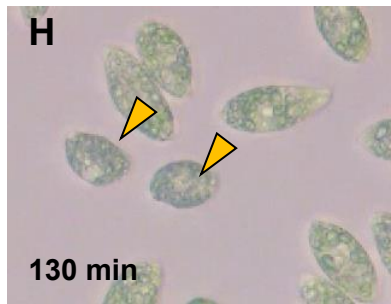

Supplement: Figure_S1.pdf [file Figure_S1.pdf]
